# Supplementary material
Source: publisher figshare collection journal article supplement (https://gsajournals.figshare.com/ndownloader/files/15078341)
Supplement: Supplementary file 1 [file 15078341]

## Sheet: Sheet1
Chromosome	Position	Ref	msh1Δ allele	Gene	Effect	Note
Chr_1	1941871	A	G	CNAG_00741	Missense Lys140Glu
Chr_3	1033968	T	G	CNAG_02682	Intronic SNP	On border of deletion allele of CNAG_02682, likely introduced with the transformation
Chr_3	1128116	G	A	CNAG_07532	Missense Ala96Val
Chr_5	413182	C	T	CNAG_01395	Missense Val194Ile
Chr_5	466369	G	T	Intergenic
Chr_7	392992	T	C	CNAG_06652	Start gain
Chr_8	195426	G	T	CNAG_03151	Glu313Stop
Mitochondrial	106	T	C	CNAG_09000	synonymous
Mitochondrial	186	TA	T	CNAG_09000	frameshift variant	Late in the transcript, single base deletion in a 6A homopolymer run
Mitochondrial	15946	G	A	Intergenic
Mitochondrial	16144	T	TAA	Intergenic		Shift in 11A homopolymer run
Mitochondrial	20510	A	G	CNAG_09009	Missense Ile281Val
Mitochondrial	20773	T	C	CNAG_09009	synonymous
Mitochondrial	21687	T	TAA	Intergenic		Shift in 8A homopolymer run
Mitochondrial	22487	A	G	CNAG_09010	synonymous
Mitochondrial	23633	T	C	CNAG_09011	missense Tyr58His
